1        **Detour learning ability and the effect of novel sensory cues on**  
2                    **learning in Australian bull ants, *Myrmecia midas***

3

4        Muzahid Islam<sup>1</sup>, Sudhakar Deeti<sup>1</sup>, Zakia Mahmudah<sup>1</sup>, J. Frances Kamhi<sup>1,2</sup>, Ken Cheng<sup>1</sup>

5

6        <sup>1</sup>Department of Biological Sciences, Macquarie University, Sydney, Australia

7        <sup>2</sup>Neuroscience Department, Oberlin College, Oberlin, Ohio, USA

8

9        Subject Category: Neuroscience and Cognition

10       Running Head: Learning & Cognitive ability of bull ant

11

12       Keywords: Detour Learning, Successful Foragers, Path Straightness, Motor Routine

13

14       Author for correspondence:

15       Muzahid Islam

16       e-mail: muzahid.islam1@gmail.com

17

18 **Detour learning ability and the effect of novel sensory cues on**  
19 **learning in Australian bull ants, *Myrmecia midas***  
20

21 **ABSTRACT**

22 Many animals navigate in a structurally complex environment which requires them to detour around  
23 physical barriers that they encounter. While many studies in animal cognition suggest that they are able to  
24 adeptly avoid obstacles, it is unclear whether a new route is learned to navigate around these barriers and,  
25 if so, what sensory information may be used to do so. We investigated detour learning ability in the  
26 Australian bull ant, *Myrmecia midas*, which primarily uses visual landmarks to navigate. We first placed a  
27 barrier on the ants' natural path of their foraging tree. Initially, 46% of foragers were unsuccessful in  
28 detouring the obstacle. In subsequent trips, the ants became more successful and established a new route.  
29 We observed up to eight successful foraging trips detouring around the barrier. When we subsequently  
30 changed the position of the barrier, made a new gap in the middle of the obstacle, or removed the barrier  
31 altogether, ants mostly maintained their learned motor routine, detouring with a similar path as before,  
32 suggesting that foragers were not relying on barrier cues and therefore learned a new route around the  
33 obstacle. In additional trials, when foragers encountered new olfactory or tactile cues, or the visual  
34 environment was blocked, their navigation was profoundly disrupted. These results suggest that changing  
35 sensory information, even in modalities that foragers do not usually need for navigation, drastically affects  
36 the foragers' ability to successfully navigate.

37 **KEY WORDS:** Detour learning, Successful foragers, Path straightness, Motor routine  
38

---

39 **INTRODUCTION**

40 In detour learning, a significant paradigm in animal cognition, a direct route is blocked, and a  
41 new route must be taken to reach the goal. In a natural environment, animals face various  
42 situations where obstacles block their regular shortest path to reach a destination, and in most  
43 cases, they can negotiate these obstacles (Zucca et al., 2005; Kabadayi et al., 2018). Several  
44 ecological and contextual factors might affect the efficiency of animal detour learning, such  
45 as the nature of the barrier, goal distances, detour experiences, reward visibility, and  
46 motivation (Kabadayi et al., 2018). To meet these challenges, animals may integrate both  
47 external and internal cues that help to redirect their movement (Giurfa, 2015; Kabadayi et al.,  
48 2018) but it is unknown what cues are used for establishing a new route.

49  
50 Two forms of detour learning have been identified: spatial learning, characterized by gradual  
51 learning, and spatial reasoning, characterized by quick learning. Spatial learning occurs if an  
52 individual develops a tendency to select the shortest route over multiple trips. In contrast,  
53 spatial reasoning occurs if an individual selects the shortest path to a destination  
54 spontaneously on its first trip based on memory and visual inspection (Kabadayi et al., 2018).  
55 Detour abilities have been studied in a wide range of taxa including vertebrates such as apes  
56 (Kohler, 1925), rats and mice (Juszczak et al., 2016), dogs (Pongracz et al., 2001; Siniscalchi  
57 et al., 2013) goats (Naworth et al., 2016; Langbein et al., 2018), horses (Baragli et al., 2011;  
58 Baragli et al. 2017), marsupials (Wynne and Leguet, 2004), fish (Bisazza et al., 1997;  
59 Sovrano et al., 2018; Lucon-Xiccato et al., 2019), birds (Vallortigara et al., 1999; Zucca et  
60 al., 2005) and invertebrates such as spiders (Tarsitano and Jackson, 1997; Aguilar-Argüello et

61 al., 2019), and bees (Kevan, 2015; Ong et al., 2017). In most detour experiments, animals  
62 have been tested repeatedly to examine their learning abilities (Kabadayi et al., 2018).  
63 Several studies have shown gradual improvements in detouring over multiple trials (Parker et  
64 al., 2005; Smith and Litchfield, 2010; Boogert et al., 2011). For example, horses reach their  
65 goal faster over trials when they encounter an obstacle (Baragli et al., 2011). On the very first  
66 trip, some horses were unsuccessful in detouring the barrier but from the second trip they  
67 improved their success. Similarly, dingos in a detour learning experiment improved their  
68 performance significantly over four trials (Smith and Litchfield, 2010). Another detour  
69 learning experiment was done on mice, which exhibited a preference for one or the other side  
70 of the barrier and optimized the direction of movement based on their previous experiences,  
71 showing gradual learning over trials (Juszczak et al., 2016). Another study investigated the  
72 ability to progress around a barrier to a desired food source in four quokkas, *Setonix*  
73 *brachyurus*, in their natural environment (Wynne and Leguet, 2004). Among them, three  
74 quokkas preferred to detour either right or left around the obstacle, showing spatial learning,  
75 while the fourth showed no behavioural laterality but exhibited spatial reasoning.

76

77 Ants are highly efficient navigators in complex natural environments (Freas and Cheng,  
78 2019; Lihoreau and Schwarz, 2020; Buehlmann et al., 2020). There have been few studies of  
79 detour ability in ants. A detour strategy was observed in the crazy ant, *Paratrechina*  
80 *longicornis* in obstacle navigation during cooperative transport (McCreery et al., 2016).  
81 These ants proved effective at implementing a flexible or stochastic strategy that works for  
82 both simple and complex barriers. Another detour experiment on *Cataglyphis fortis* ants  
83 showed that when a barrier was set between the nest and releasing point, homing ants, tested  
84 just once, usually walked towards the barrier, and when coming close to the barrier, deviated  
85 around one of the sides and moved forward to the goal (Schmidt et al., 1992). Desert ants  
86 (*Melophorus bagoti* and *Cataglyphis fortis*) can also learn a route detour around a pit trap  
87 (Wystrach et al., 2020).

88

89 The Australian nocturnal bull ant, *Myrmecia midas*, is an excellent navigator that forages on  
90 eucalyptus trees by using primarily visual information (Freas et al., 2017a; Freas et al., 2018;  
91 Freas and Cheng, 2019; Islam et al., 2020). Nest entrances of these bull ants are usually  
92 located close to a eucalyptus tree, called their nest-tree (Freas et al., 2018). Ants forage  
93 individually in the tree canopy of either their nest tree or other nearby trees for insect prey  
94 and sap. There is no evidence of trail pheromone for recruitment or any other recruitment  
95 interaction among the foragers. Ants from each nest typically travel to a foraging tree in  
96 evening twilight and back to their nest before morning twilight (Freas et al., 2017a; Freas et  
97 al., 2018).

98

99 This study investigated the ability of *M. midas* to detour around a barrier during the  
100 ascending navigation on their foraging tree, with a focus on four questions. First, would the  
101 ants successfully move around the detour on each trial? Second, would the ants show spatial  
102 learning or spatial reasoning? Third, how would the bull ants modify their route when the  
103 barrier is removed partially or completely? Fourth, how would ants behave when  
104 encountering visual and non-visual sensory changes along their new route? We hypothesized

105 that ants would learn to overcome the barrier gradually with repeated trials, as seen in  
106 previous detour learning studies (e.g., Parker et al., 2005; Smith and Litchfield, 2010;  
107 Boogert et al., 2011). Given their reliance on visual cues for navigation, we predict that the  
108 ants would follow their newly learned route when encountering any changes of barrier  
109 position or any olfactory or tactile changes on their foraging route, but that they would  
110 navigate less successfully when visual cues around the tree were blocked.

111

## 112 **MATERIAL AND METHODS**

### 113 **Animal and experimental site**

114 The experimental site was located at Macquarie University campus, Sydney, Australia  
115 (33°46'11" S, 151°06'40" E). Nocturnal bull ants, *Myrmecia midas*, typically build their nest  
116 close to a Eucalyptus tree. We selected two nests 200 m apart which were located close to a  
117 smooth-skinned eucalyptus tree, *E. viminalis*. In Experiment-1, we conducted experiments  
118 on both Nest-A and Nest-B during 2018–2019 and on only Nest-A during 2019–2020. In  
119 Experiment-2, we conducted experiments on Nest-A during 2019–2020. A tree is usually  
120 located less than 30 cm from nest entrances of *M. midas* colonies (Freas et al., 2017a; Freas  
121 et al., 2017b). This tree is termed the “nest-tree.” Ants typically emerge from the nest  
122 entrance, walk a few centimetres on the ground, and then many foragers climb vertically up  
123 the nest-tree. We call this behaviour “ascending navigation,” which is perpendicular to the  
124 direction of navigation on the ground. To record the path of individual foragers during their  
125 ascending foraging trips, a grid was drawn from the bottom of the tree to 1.5 m high on the  
126 tree trunks of the nest-trees of both Nest-A and Nest-B. Each grid consisted of 10-cm squares  
127 (Fig. 1) that covered the diameter of the tree trunk with code numbers on the grid to identify  
128 locations on the grid. The circumference of the Nest-A and Nest-B nest-tree trunks were 200  
129 cm and 160 cm, respectively.

130

### 131 **Experimental procedure**

132 **Experiment 1:** In the Control Condition, we observed individually marked ants between 7:00  
133 p.m. and 9:30 p.m. for seven consecutive nights to record the frequency and paths of natural,  
134 unobstructed foraging routes on the nest-tree. On the very first night, we captured the ants  
135 from the nest-tree trunk by using plastic tubes and put them into an icebox with ice for 3–5  
136 minutes to cool. Then foragers were painted with a unique colour code on the dorsal side of  
137 their body with Citadel Paint (Games Workshop, UK). For detour learning tests, we chose  
138 those marked ants that ascended to forage on the nest-tree at least three times out of seven  
139 consecutive nights (104 foragers out of 135, 18 ants from Nest-A 2018–2019, 14 ants from  
140 Nest-B and 72 ants Nest-A 2019–2020). In the Learning Condition, a piece of white art paper  
141 (15 cm in diameter and 0.25 mm thick) was placed at 1 m from the bottom of the tree trunk  
142 which covered 50% of the perimeter of the nest-tree trunk, obstructing their natural foraging  
143 corridor on the nest side (Fig. 1). We tested the selected 104 foragers in up to eight trials each  
144 with a detour barrier over 21 consecutive nights immediately after the Control Condition for  
145 each nest.

146



147 **Experiment 2:** After the Control and Learning Conditions on Nest-A in 2019–2020, we  
148 tested foragers one time in each of six different conditions in order: Extension Condition (we  
149 moved the barrier from 1 m to 1.5 m from the bottom of the tree trunk, n=38), Gap in Middle  
150 Condition (we made a 20-cm gap in the middle of the barrier, n= 40), No Barrier Condition  
151 (we took off the entire barrier, n=36), Tactile Condition [we added a cream-coloured cloth  
152 (100 cm × 120 cm) which covered between 0.5 m and 1.5 m height on the front side of the  
153 tree trunk, n=38], Olfactory Condition (we sprayed perfume on two different places of the  
154 tree trunk at 50 and 80 cm height which made two parallel lines and covered 50% of nest  
155 side, n=25), and Visual Condition (we installed a 2-m wide and 1.25-m tall black screen on  
156 both the right and left sides symmetrically on the ground and 50 cm from the edge of the tree  
157 trunk on both sides, n=36). The barrier was not removed in the Tactile, Olfactory and Visual  
158 Conditions. After testing in each Condition, we allowed the foragers 10 days of relearning the  
159 route with the barrier (Table S1, Fig. S1). During relearning, we kept the barrier at 1 m from  
160 the bottom of the tree trunk as in the Learning Condition. We used the individually marked  
161 foragers observed in the Control and Learning Conditions for all of the additional Conditions.  
162 Not all ants were tested in each condition because some ants did not forage every night of the  
163 experimental conditions. Full details of methods are provided in the supplementary materials.  
164

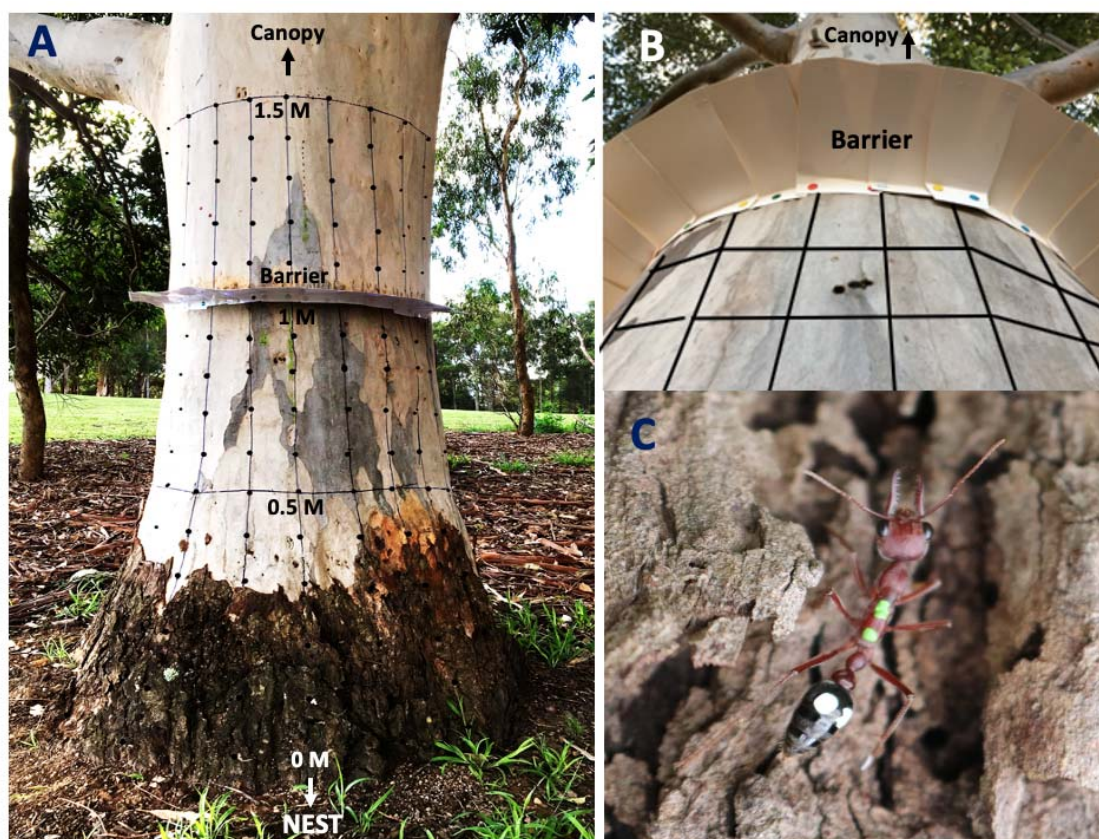

165  
166

167 **Fig. 1.** The experimental set up for the detour learning experiments on Australian nocturnal  
168 bull ants, *Myrmecia midas*, on their nest-tree: A. The tree trunk of a nest-tree (Nest-A) with a  
169 grid from the base of the tree (0 m) to 1.5 m. A white cardboard barrier was placed

170 perpendicular to the tree trunk at 1 m from the base of the tree trunk which covered 180  
171 degrees at the nest-side. B. A close view of the barrier that the foragers were confronted  
172 with. C. A uniquely colour-coded nocturnal bull ant *Myrmecia midas* ascending towards the  
173 top of the tree during detour learning. The photo was taken when the worker ant started at the  
174 bottom of the foraging tree in the evening twilight.  
175

## 176 **Statistical Analysis**

177 Graph-Click ([www.arizona-software.ch/graph-click](http://www.arizona-software.ch/graph-click)) was used to digitize the path of  
178 individual foragers. By using a custom-written MATLAB (MATLAB 2019b) program, we  
179 plotted the paths of the foragers and calculated the path straightness of individual ants in both  
180 the Control Condition and the Learning Condition in the two different nest-trees separately.  
181 We determined the path straightness for the path from the bottom of the tree to one-meter  
182 height as the ratio of the straight-line distance to the sum of all segments of the path  
183 (Palavalli-Nettimi et al., 2018) transformed so that 0.5 is the maximum value. For the Control  
184 Condition, the straight-line distance for individual foragers was ~1 m, but in the Learning  
185 Condition, the straight-line distances were 112 cm and 108 cm (from the bottom of the tree  
186 trunk to edge of the barrier) in Nest-Tree A and Nest-Tree B, respectively. For all of the  
187 other conditions except the Extension Condition the straight-line distance was also 112 cm  
188 (straightness measured up to 1 m). For the Extension Condition this distance was 158 cm  
189 (straightness measured up to 1.5 m). We considered ants as successful on a trip if they passed  
190 the barrier located at 1 m from the bottom of the tree trunk.  
191

192 For the Learning Condition, we conducted repeated-measures ANOVAs in SPSS to compare  
193 the mean path straightness across the 3<sup>rd</sup> Control run in the Control Condition and 5  
194 successful foraging trips (1<sup>st</sup>, 2<sup>nd</sup>, 3<sup>rd</sup>, 5<sup>th</sup> and 8<sup>th</sup>) of the Learning Condition in Nest-A 2018–  
195 2019, Nest-A 2019–2020 and Nest B. We determined whether there was a significant  
196 difference in path straightness of each successful learning trip in the Learning Condition  
197 compared to the Control Condition by using a Bonferroni correction. The foraging duration  
198 was timed when individual ants started from the bottom (0 cm) of the nest tree until they  
199 reached 1.5 m from the bottom in both the Control Condition and the Learning Condition.  
200 We conducted a one-way repeated-measures ANOVA with a Bonferroni correction to  
201 compare durations of the 3<sup>rd</sup> trip of the Control Condition and 5 different successful foraging  
202 trips (1<sup>st</sup>, 2<sup>nd</sup>, 3<sup>rd</sup>, 5<sup>th</sup> and 8<sup>th</sup>) during the Learning Condition in Nest-A 2018–2019, Nest-A  
203 2019–2020 and Nest B. All of the foragers detoured either on the left or right side of the  
204 barrier during their learning trips. We reflected the paths of the ants going to the right so that  
205 all ants, conceptually, headed to the left side of the barrier. This practice allowed data to be  
206 pooled to examine how the foragers adjusted their upward path with the barrier over trips. To  
207 compare changes in paths over foraging trips (3<sup>rd</sup> control trip, 1<sup>st</sup>, 2<sup>nd</sup>, 3<sup>rd</sup> 5<sup>th</sup> and 8<sup>th</sup>  
208 successful foraging trips), the mean positions on the *x*-axis (horizontal position) of the ants on  
209 the tree trunk at 0 cm, 10 cm, 20 cm, 30 cm, 40 cm, 50 cm, 60 cm, 70 cm, 80 cm and 90 cm,  
210 we used a two-way repeated-measures ANOVA with height and trip as factors. For all  
211 repeated measure ANOVA, while the *p*-value represents whether the difference between

212 conditions is statistically significant or not, partial eta squared ( $\eta^2$ ) illustrates about the  
213 magnitude of this difference, or effect size. A value of  $\eta^2 \geq 0.14$  is considered a large effect.

214

215 In Experiment-2, to compare path straightness and duration, paired-samples t-tests were  
216 conducted to compare the differences between last learning trips or relearning trips and test-  
217 condition trips (for instance, Middle Gap tests vs. immediately preceding relearning trip). We  
218 report effect sizes (Cohen's d) along with statistical significance levels. Data were analyzed  
219 using SPSS Statistics (Version 26), MATLAB (2019b) and R-Studio (Version  
220 1.2.1335/2019).

221

## 222 RESULTS

### 223 A. Experiment-1: Detour Learning

#### 224 Successful versus unsuccessful foraging trips

225 Pooling results from both Nest-trees A and B in both experiments, first foraging trips with a  
226 barrier were challenging for individual foraging ants, with 46% unsuccessful (Fig. 2). The  
227 ants improved steadily over trips, with almost all successful by the 5<sup>th</sup> trip.

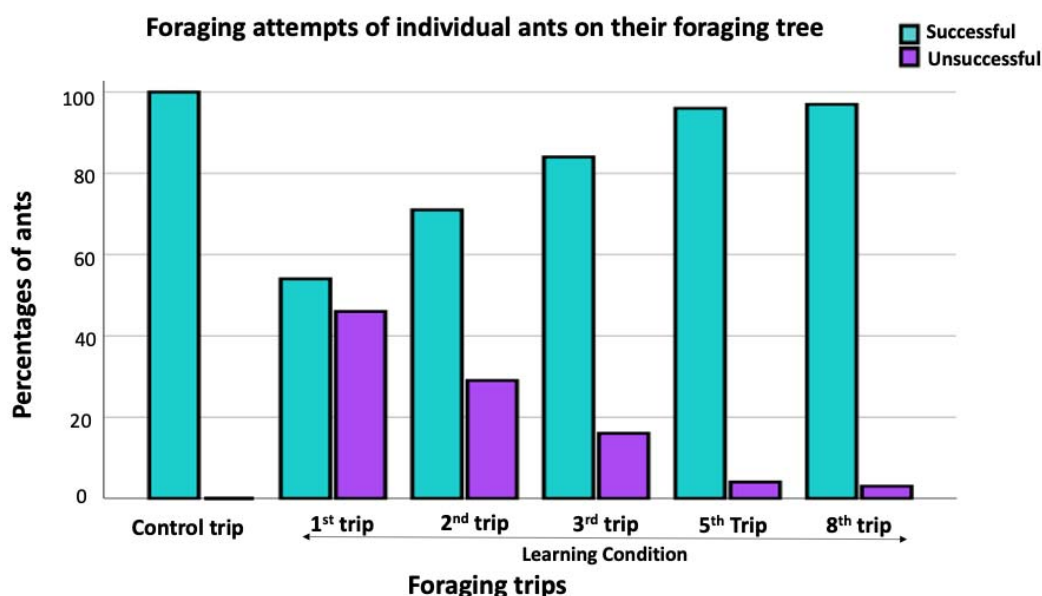

228

229 **Fig. 2.** The percentages of successful and unsuccessful foraging ants (N=104, Nest-Tree A,  
230 2018–2019=18, Nest-Tree B=14, Nest-Tree A, 2019–2020=72) in the 1st, 2nd, 3rd, 5th and  
231 8th attempts of foraging trips.

232

#### 233 Position of foragers on the tree trunk on successful foraging trips

234 In the Control Condition, foragers' position was close to 0 on the  $x$ -axis from 0 cm to 90 cm  
235 of the tree trunk (data not shown). Over trips in the Learning Condition, foragers' average  
236 heading position became farther from 0 on the  $x$ -axis, which indicates ants learning to detour.

237 A two-way repeated-measures ANOVA examined the effects of trips and height on the y-axis  
 238 on the dependent variable of x-axis position. In Nest-Tree A 2018–2019, there was a  
 239 statistically significant interaction between trips and y-axis height [F (36,600) =6.273,  $p <$   
 240  $.05$ ,  $\eta p^2 = 0.273$ ]. There were also significant main effects of trips [F (4,600) =149.03,  $p <$   
 241  $.05$ ,  $\eta p^2 = 0.499$ ] and height on the y-axis [F (9,600) =11.495,  $p <$   $.05$ ,  $\eta p^2 = 0.407$ ]. In Nest-  
 242 Tree A 2019–2020, a statistically significant interaction was also observed between trips and  
 243 position on the y-axis [F (36,3599) =9.85,  $p <$   $.05$ ,  $\eta p^2 = 0.191$ ]. Significant main effects were  
 244 also found for trips [F (4,3599) =400.78,  $p <$   $.05$ ,  $\eta p^2 = 0.308$ ] and position on the y-axis [F  
 245 (9,3599) =117.71,  $p <$   $.05$ ,  $\eta p^2 = 0.227$ ]. Like Nest-A, there was a statistically significant  
 246 interaction between trips and y-axis position of ants in Nest-Tree B [F (4,320) =5.743,  $p <$   
 247  $.05$ ,  $\eta p^2 = 0.392$ ] and also significant main effects of trips [F (4,320) =135.28,  $p <$   $.05$ ,  $\eta p^2 =$   
 248  $0.628$ ] and height on the tree [F (9,320) =13.09,  $p <$   $.05$ ,  $\eta p^2 = 0.594$ ]. In all experiments, the  
 249 position of foragers on the tree trunk was not significantly different ( $p > 0.05$ ) between the  
 250 Control Condition and the 1st successful foraging trip. However, the 2nd, 3rd, 5th and 8th  
 251 successful foraging trips were significantly different ( $p < 0.05$ ) compared to the Control  
 252 Condition. Importantly, in the Learning Condition, there were no significant differences of  
 253 ants' mean position on the x-axis of the tree trunk between the 5th and the 8th successful  
 254 foraging trips ( $p > 0.05$ ). The head positions of foragers on the x-axis were not significantly  
 255 different across trips at 0 cm and 10 cm height, but from 20 to 90 cm height, foragers' x-axis  
 256 positions were significantly different ( $p < 0.05$ ) across trips, suggesting that detouring started  
 257 between 10 cm and 20 cm height on the tree trunk (Fig. 3).

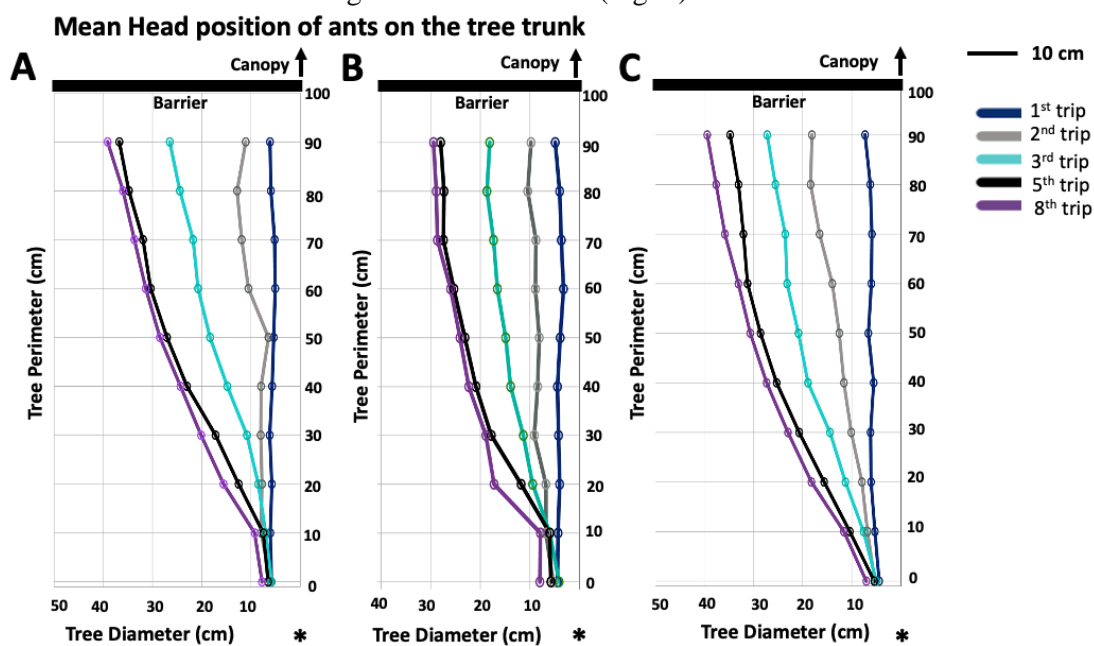

258

259

260 **Fig. 3.** Interaction between trip number in the Learning Condition and height on the tree  
 261 trunk in the x-axis position of ants on the nest-tree trunk in Nest-tree A 2018–2019 (A), Nest-  
 262 tree B (B) and Nest-tree A 2019-2020 (C). Nest-tree A trunk was 200 cm in circumference  
 263 where Nest-tree B was 160 cm in circumference and the barrier covered 50% on the front  
 264 side at 1 m from the bottom of the tree trunk (see details in Experimental Procedure). The



265 figure represents one half of the front (nest) side of the tree trunk. The  $x$ -axis represents the  
266 horizontal position on the tree trunk and the  $y$ -axis represents the height on the tree trunk. We  
267 reflected the paths of the ants going to the right so that all ants are, conceptually, headed to  
268 the left side of the barrier. The coloured dotted lines illustrate the mean of  $x$ -axis positions of  
269 ants on the tree trunk in different successful learning trips. The black line indicates the  
270 position of the barrier on the tree trunk at 1 m. Ant paths are shown from 0 cm to 90 cm of  
271 the tree trunk. The arrow indicates the canopy direction and the ‘\*’ indicates the nest  
272 position.

273

274 The mean data in figure 3 hide notable individual differences in detour learning. Foragers  
275 showed 3 types of detour learning: A. Gradual learning, a forager that learned the detour path  
276 gradually (figure S2A); B. Quick learning, a forager that adjusted after 2 trips (figure S2B);  
277 C. Barrier-avoiding learning, a forager that followed the foraging corridor up to the barrier  
278 and then detoured to one side (Fig. S2C).

279

### 280 **Path Straightness**

281 The path straightness of foragers in detour learning was compared to their performance in the  
282 control condition. Foragers ascended directly to the canopy on the tree-trunk in the Control  
283 Condition, thus having a path straightness near the maximum value of 0.5 (figure 4). Path  
284 straightness dropped sharply in the 1<sup>st</sup> successful foraging trip in the Learning Condition, and  
285 then improved over trips. In the 5<sup>th</sup> and 8<sup>th</sup> successful foraging trips foragers performed  
286 straighter paths like those in the Control Condition. A one-way repeated-measures ANOVA  
287 showed a statistically significant difference between the Control Condition and successful  
288 foraging trips in the Learning Condition of foragers in all experiments: Nest-Tree A 2018–  
289 2019 ( $F(5,75) = 151.05$ ,  $p < 0.001$ ,  $\eta^2 = 0.988$ ), Nest-Tree B ( $F(5,40) = 38.56$ ,  $p < 0.001$ ,  
290  $\eta^2 = 0.903$ ) and Nest-tree A 2019–2020 ( $F(5,355) = 334.06$ ,  $p < 0.001$ ,  $\eta^2 = 0.825$ ). Post  
291 hoc comparisons using Bonferroni correction showed that the first two successful trips in the  
292 Learning Condition were significantly less straight when compared with the Control  
293 condition in all experiments, while the third trip was significantly less straight in the 2018-19  
294 field season (Fig. 4). The 5<sup>th</sup> and 8<sup>th</sup> trips did not differ significantly from the Control  
295 Condition in either colony or season.

296

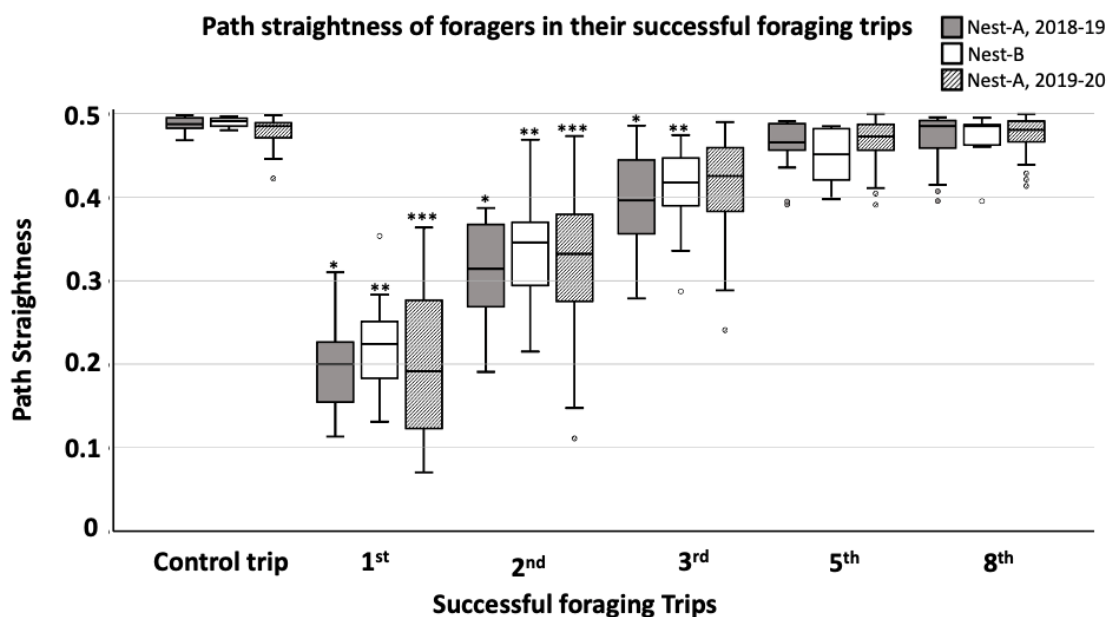

297

298 **Fig. 4.** Path straightness of *Myrmecia midas* during their Control and Learning Conditions.  
 299 The ‘\*’ indicates that the path straightness of the 1<sup>st</sup>, 2<sup>nd</sup> and 3<sup>rd</sup> successful foraging trips were  
 300 significantly different from the Control Condition in Nest-A 2018–2019 and the ‘\*\*\*’  
 301 indicates a significant difference in path straightness compared to the Control Condition in  
 302 Nest-B. Similarly, ‘\*\*\*’ represents the significant differences of path straightness in their 1<sup>st</sup>,  
 303 2<sup>nd</sup> and 3<sup>rd</sup> learning trips compared to the Control Condition in Nest-A 2019–2020. The box  
 304 plots indicate medians (solid black line), box margins (25th and 75th percentiles) and  
 305 whiskers (5th and 95th percentiles) in this and all following figures.

306

### 307 **Duration of foraging trips**

308 In the 1<sup>st</sup> successful foraging trip ants took 2–3 fold more time compared to the Control  
 309 Condition (figure 5). Over successful learning trials foragers took significantly less time to  
 310 pass the barrier compared to the Control Condition in all experiments: Nest-tree A 2018–  
 311 2019 ( $F(5,75) = 84.02, p < 0.001, \eta p^2 = 0.851$ ), Nest-Tree B ( $F(5,40) = 34.012, p < 0.001,$   
 312  $\eta p^2 = 0.812$ ), Nest-tree A 2019–2020 ( $F(5,355) = 154.65, p < 0.001, \eta p^2 = 0.685$ ). Post hoc  
 313 comparisons using Bonferroni correction indicated significant differences from the Control  
 314 Condition in the first two trips in the Learning Condition in all experiments, while the third  
 315 trip differed significantly from the Control Condition in two of the three experiments (Fig.  
 316 5). The 5<sup>th</sup> and 8<sup>th</sup> trips did not differ significantly from the Control Condition in any  
 317 experiment.

318

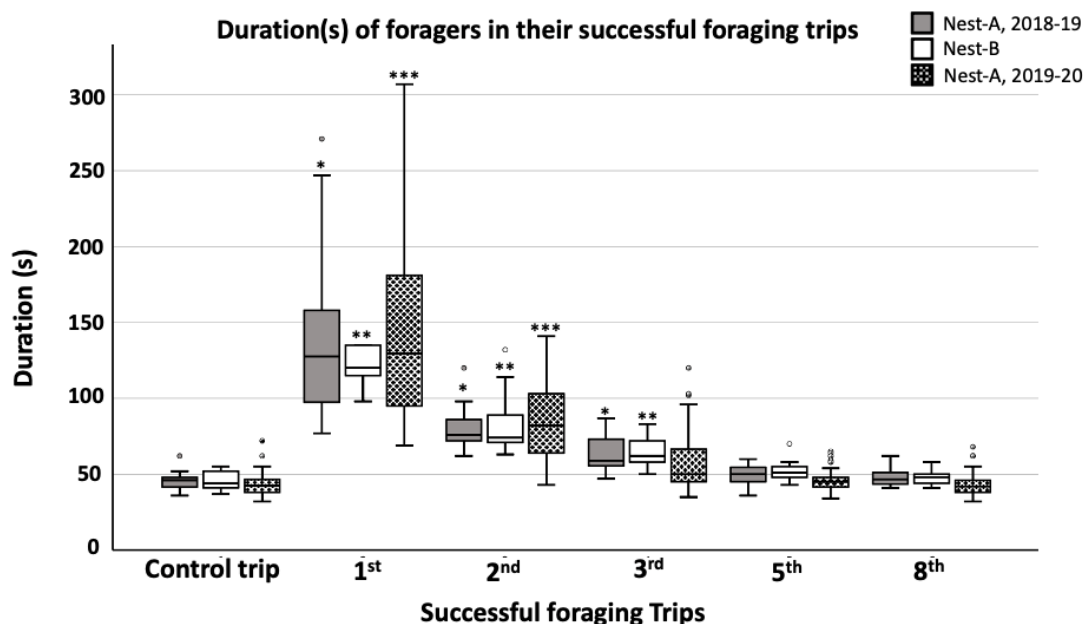

319

320 **Fig. 5.** The duration (up to 1.5 m height) on the ants' successful foraging trips in both Nest-A  
321 and Nest-B. The '\*' indicates that the duration of 1<sup>st</sup>, 2<sup>nd</sup> and 3<sup>rd</sup> successful foraging trips  
322 were significantly different from the Control Condition in Nest-A 2018–2019 and the '\*\*\*'  
323 indicated the significant differences in duration compared to the Control Condition in Nest-B.  
324 Similarly, '\*\*\*' represents the significant differences of duration in their 1<sup>st</sup> and 2<sup>nd</sup> learning  
325 trips compared to the Control Condition in Nest-A 2019–2020.

### 326 **Laterality sequence in detour learning**

327 Foragers performed with individual side preferences during their successful learning trips.  
328 Only two out of 104 foragers modified their foraging direction and detoured both to the right  
329 and to the left sides. In both colonies and seasons, similar numbers detoured on the left and  
330 right sides. A binomial test showed the proportions of right and left detours do not differ  
331 significantly from the chance of expectation of 50:50 in any group (Table S2).

332

## 333 **B. Experiment-2: Effect of Changes on Learning**

### 334 **Effects of barrier position on detour learning**

335 Changing the barrier position (Extension Condition), adding a gap to the barrier (Middle Gap  
336 Condition), and removing the barrier (No Barrier Condition) did not greatly affect the paths  
337 of the ants. The ants took a similar path as in the previous experiment (Fig. 6A-C). Even with  
338 no barrier at all, the ants headed to the position of the edge of the barrier. Although path  
339 straightness (Fig. 7) and trip duration (Fig. 8) in the first test (Extension Condition) differed  
340 from the previous learning trip (path straightness, paired t test,  $t(35) = 5.838$ ,  $p < 0.001$ ;  
341 duration, paired t test,  $t(35) = -3.468$ ,  $p = 0.001$ ), these differences disappeared in the  
342 subsequent two tests, including the test with the drastic change of not having any barrier at  
343 all.

344

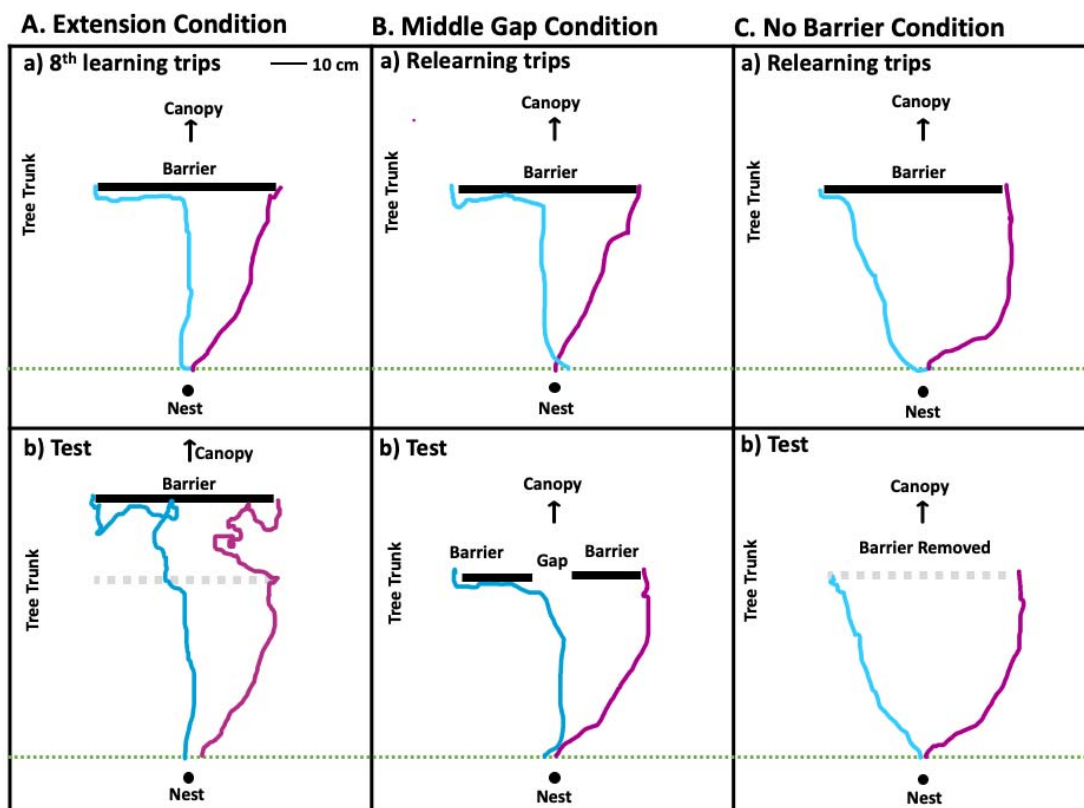

345

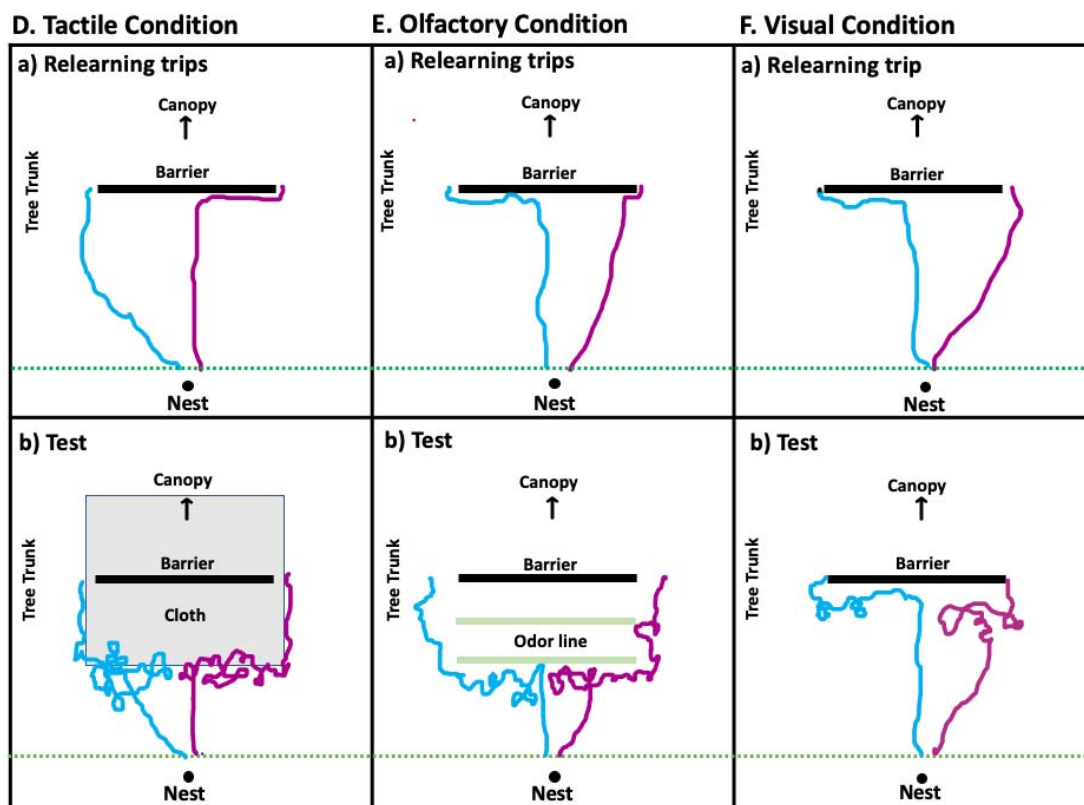

346

347 **Fig. 6.** Exemplary paths of foragers in 6 different conditions with manipulations: (A)  
348 Extension Condition, (B) Middle Gap Condition, (C) No Barrier Condition, (D) Tactile  
349 Condition, (E) Olfactory Condition, and (F) Visual Condition. In each condition, (a)  
350 represents foragers' habitual path after 8<sup>th</sup> learning trips or relearning trips in the presence of  
351 barrier at 1m whereas (b) represents the ant's response to the particular Changes.  
352

### 353 **Effect of tactile changes on learning**

354 When foragers encountered the tactile changes on their foraging tree trunk, they mostly  
355 avoided the added cloth and moved around it (Fig. 6D). The ants stopped, scanned, and  
356 searched for an alternative way to reach the tree canopy (figure S3). As a result, paths were  
357 less straight (paired t test,  $t(39) = 12.56$ ,  $p < 0.001$ ) and of longer duration (paired t test,  $t$   
358  $(39) = -3.468$ ,  $p < 0.001$ ) compared to the last relearning trip before the Tactile Condition  
359 (Fig. 7 & Fig. 8).  
360

### 361 **Effect of olfactory changes on learning**

362 In the Olfactory Condition, individual foragers similarly avoided the new odour and  
363 attempted to move around it (Fig. 6E). Foragers stopped just before the first odour line,  
364 meandered around the odour line, and then ascended the tree. As a result, trips were less  
365 straight (paired t test,  $t(25) = 9.05$ ,  $p < 0.001$ ) and took more time (paired t test,  $t(25) = -$   
366  $7.146$ ,  $p < 0.001$ ) compared to the relearning trips (Fig. 7 and 8).  
367

### 368 **Effect of visual changes on learning**

369 Foragers were also affected in the Visual Condition. Paths appeared similar to the relearning  
370 trials until the ants approached the cloths on the sides of the tree (figure 6F). Hesitancy,  
371 meandering, and scanning then set in (Fig. 7 & Fig. 8). As a result, foragers were less straight  
372 (paired t test,  $t(35) = 4.306$ ,  $p < 0.001$ ) and took more time (paired t test,  $t(35) = -4.83$ ,  $p =$   
373  $0.001$ ) compared to the relearning trips. After passing halfway from the bottom of the tree  
374 trunk to the barrier, foragers observed the visual changes. Most of the foragers stopped,  
375 scanned, and then moved around the barrier to reach the canopy (Fig. 6 and Fig. S3).  
376



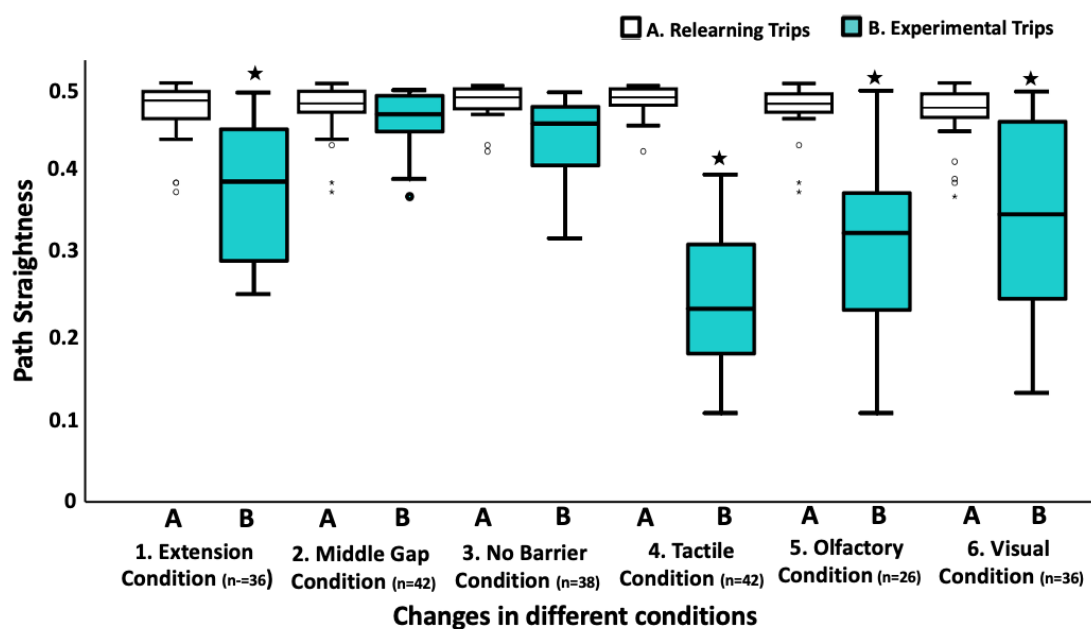

377

378 **Fig. 7.** The path straightness of the nocturnal bull ants in different experimental conditions.  
379 The ‘\*’ indicates that the path straightness of a condition was significantly different from the  
380 relearning trips of the same condition.

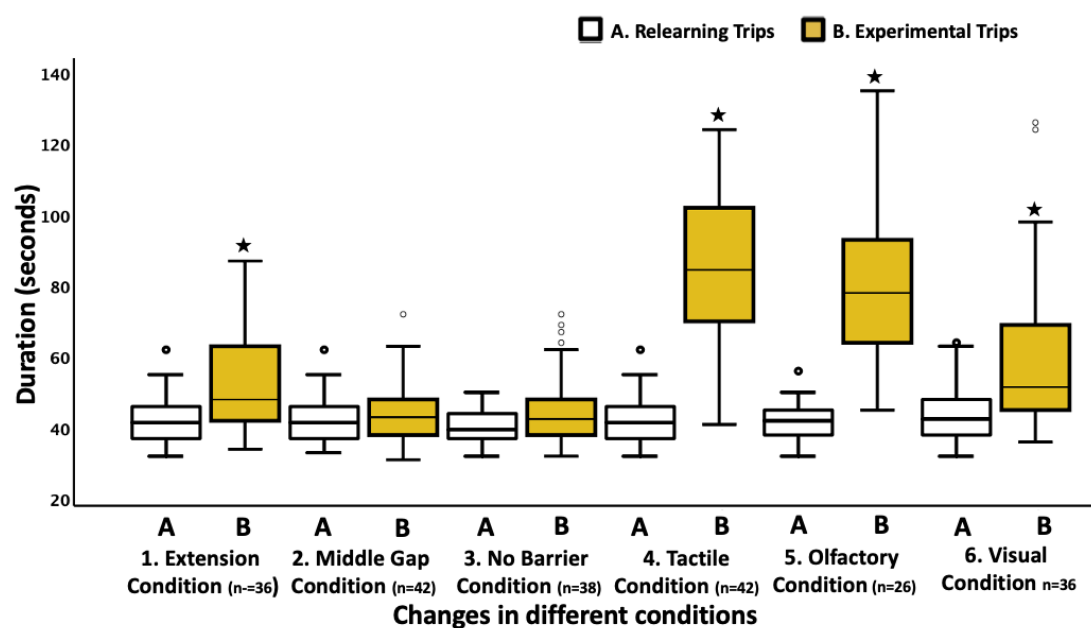

381

382 **Fig. 8.** The time taken to reach 1.5 m above the nest entrance of the nocturnal bull ants in  
383 different experimental conditions. The ‘\*’ indicates that the duration of a condition was  
384 significantly different compared to the relearning trips of the same condition.

385

## 386 DISCUSSION

387 Our findings demonstrate both how nocturnal bull ants learn to avoid obstacles in their  
388 environment and how they adapt their learned motor routine to novel sensory stimuli. When

389 the foragers confronted the barrier on their foraging corridor for the first time, almost half of  
390 them failed to overcome the barrier. In subsequent trips, the foragers became more  
391 successful. In subsequent detour trials, foragers became faster to pass the barrier and paths  
392 became straighter. Some foragers modified their foraging paths quickly, even within two  
393 trials, while other ants changed the paths more gradually over trips. When the position of the  
394 barrier was changed or removed altogether, foragers predominantly showed their learned  
395 motor routine, detouring with a similar path as before. We also found that when foragers  
396 detected the tactile or olfactory changes, they immediately showed neophobic behaviour,  
397 scanning and avoiding those novel cues. Visual changes on their learned route also adversely  
398 affected their navigation and motor routine.

399

400 The tested ants improved from 54% success on their first detour trial to 98% success on their  
401 8<sup>th</sup>. Studies on other animals have shown a similar progression in increased success rates in  
402 multiple trials of detouring around a barrier on their way to a goal. In horses (*Equus*  
403 *caballus*), domestic dogs (*Canis familiaris*), domestic chicks, mice and dingoes, more than  
404 50% individuals were successful in their first attempt and the success rate improved over  
405 trials (Pongrácz et al., 2001; Pongrácz et al., 2005; Baragli et al., 2011, Juszczak et al., 2016).  
406 Many studies found improved detouring over trials (Pongrácz et al., 2001; Wallis et al. 2001;  
407 Parker et al., 2005; Smith and Litchfield, 2010; Boogert et al., 2011; Anderson et al., 2016).  
408 In our detour learning experiments, foragers became faster to pass the barrier and walked  
409 straighter paths over several trials. Most of them veered left or right on the trunk well before  
410 the barrier. Several studies have found that animals become faster in reaching the destination  
411 around a barrier over several trials (Spigel, 1964; Vallortigara et al., 1988; Lockman et al.,  
412 2001; Parker et al., 2005; Smith and Litchfield, 2010; Baragli et al., 2011; Juszczak et al.,  
413 2016).

414

415 Our experiments found that ants maintained their newly learned route when the position of  
416 the barrier was changed, or the barrier was removed altogether. The ants started at a similar  
417 position at the bottom of the tree before and after the barrier was put in place, although with  
418 the barrier, most ants headed to a different position on the tree, one edge of the barrier.  
419 Retaining the learned new route suggests that foragers were not solely using cues of the  
420 barrier to navigate around it. They could have used a combination of a local vector [67] from  
421 the bottom of the tree to the edge of the barrier and using surrounding visual cues for route  
422 guidance. Two desert ants, *Melophorus bagoti* and *Cataglyphis fortis*, also maintain their  
423 newly learned route, which many ants learned after they encountered a pit trap on the direct  
424 route home (Collett et al., 1998). The trap was not visible until the ants were right at the edge,  
425 so that on the first run with the trap, homing ants fell into the trap. Ants that learned to detour  
426 around the trap persisted in their newly learned routes even after the pit was removed.  
427 Reinforcement learning was posited to play a key role in maintaining such learned routes  
428 (Collett et al., 1998) and reinforcement learning likely played a role in maintaining the new  
429 routes of the bull ants in this study as well.

430

431 When the nocturnal bull ants encountered olfactory and tactile changes on the tree trunk, the  
432 navigation of the experienced foragers was profoundly affected. Ants avoided the changed

433 terrain. We interpret such behaviours tentatively as neophobia, an interpretation that requires  
434 further study. Novel objects are commonly used to assess neophobia, generally by placing an  
435 object near a familiar food source. Fear of novel environments (Mettke-Hofmann et al., 2009;  
436 Cohen et al., 2015; Elvidge et al., 2016) and fear of novel objects (Greenberg, 1988; Mettke-  
437 Hofmann et al., 2002; Moretti et al., 2015; Brown et al., 2016) produce a conflict between the  
438 motivation to feed and the motivation to avoid the object. Trained desert ants, *Cataglyphis*  
439 *fortis*, use odours from a food source or at the nest in navigation and searching and use the  
440 olfactory cues as route guidance in the absence of other navigational information (Wolf and  
441 Wehner, 2000; Buehlmann et al. 2015). Tactile learning experiments on *C. fortis* showed that  
442 the ants use tactile cues of the ground structure (Seidl and Wehner, 2006). With a novel or  
443 altered ground mark, however, these ants exhibited avoidance responses, likewise suggesting  
444 neophobia.

445  
446 As discussed, the tested ants were affected adversely when a part of the surrounding visual  
447 scene was blocked. Changes of visual panorama may affect the navigation of ants, sometimes  
448 severely, although their performance recovers within a few days or over several trials  
449 (Graham and Cheng, 2009; Wystrach et al., 2011; Julle-Daniere et al., 2014; Narendra and  
450 Ramirez-esquivel, 2017; Freas et al., 2018a; Freas and Cheng, 2019; Islam et al., 2020). Even  
451 small visual changes such as the removal of three trees in a forest of trees may adversely  
452 affect bull ants (Narendra and Ramirez-esquivel, 2017). The ants did not require the  
453 surrounding visual cues to the sides of the tree as they still managed to negotiate the barrier  
454 with those cues blocked, albeit with more meandering and scanning. Meandering and  
455 scanning increase when ants encounter visual changes (Narendra and Ramirez-esquivel,  
456 2017; Islam et al., 2020) and are interpreted as behaviours for learning the changed cues.  
457 Thus, we do not interpret the ants' reactions as neophobia in this case.

458  
459 Taken together, our results suggest that individual foragers learn a new route around a barrier  
460 on the tree, gradually in most cases, which is indicative of spatial learning. Most of the ants  
461 did not rely on barrier-based cues but rather used a local vector and probably surrounding  
462 visual cues to detour. Our findings also suggest a large initial neophobic response to tactile  
463 and olfactory changes on the route.

464  
465 **Authors Contribution.** MI, KC: conceptual development; MI, JFK, KC: experimental design; MI, SD:  
466 data collection; MI, ZM, SD: data analysis; MI, KC: original manuscript; MI, SD, ZM, JFK, KC: review  
467 & editing; all authors gave final approval for publication.

468  
469 **Competing Interest.** We declare we have no competing interest.

470  
471 **Funding.** This work has been partially supported by AUSMURIB000001 associated with ONR MURI  
472 grant N00014-19-1-2571 and by Macquarie University.

473  
474 **Acknowledgements.** We thank Macquarie University for giving us access and support in the field site on  
475 campus and are grateful to the Neuroethology Lab Group for valuable discussions in lab meetings.

476

## 477 **References**

- 478 **Anderson, A. V. J. and Kelly, D. C. D. M.** (2016). Inhibition in Clark' s nutcrackers  
479 (Nucifraga columbiana): results of a detour-reaching test. *Anim. Cogn.* **19**, 661–665
- 480 **Aguilar-Argüello, S., Gerhard, D. and Nelson, X. J.** (2019). Risk assessment and the use of  
481 novel shortcuts in spatial detouring tasks in jumping spiders. *Behav. Ecol.* 1–11.
- 482 **Baragli, P., Vitale, V., Sighieri, C., Lanata, A., Palagi, E. and Reddon, A. R.** (2017).  
483 Consistency and flexibility in solving spatial tasks: Different horses show different  
484 cognitive styles. *Sci. Rep.* **7**, 1–12.
- 485 **Baragli, P., Vitale, V., Paoletti, E., Sighieri, C. and Reddon, A. R.** (2011). Detour  
486 behaviour in horses (Equus caballus). 227–234.
- 487 **Bisazza, A., Pignatti, R. and Vallortigara, G.** (1997). Laterality in detour behaviour:  
488 interspecific variation in poeciliid fish. 1273–1281.
- 489 **Boogert, N. J., Anderson, R. C., Peters, S., Searcy, W. A. and Nowicki, S.** (2011). Song  
490 repertoire size in male song sparrows correlates with detour reaching, but not with other  
491 cognitive measures. *Anim. Behav.* **81**, 1209–1216.
- 492 **Brown, M. J. and Jones, D. N.** (2016). Cautious Crows: Neophobia in Torresian Crows  
493 (Corvus orru) Compared with Three Other Corvids in Suburban Australia. *Ethology*  
494 **122**, 726–733.
- 495 **Buehlmann, C., Graham, P., Hansson, B. S. and Knaden, M.** (2015). Desert ants use  
496 olfactory scenes for navigation. *Anim. Behav.* **106**, 99–105.
- 497 **Buehlmann, C., Mangan, M. and Graham, P.** (2020). Multimodal interactions in insect  
498 navigation. *Anim. Cogn.* **23**, 1129–1141
- 499 **Cohen, S., Benjamini, Y. and Golani, I.** (2015). Coping with Space Neophobia in  
500 *Drosophila melanogaster*: The Asymmetric Dynamics of Crossing a Doorway to the  
501 Untrodden. *PLoS One* **10**, 1–14.
- 502 **Collett, M., Collett, T. S., Bisch, S. and Wehner, R.** (1998). Local and global vectors in  
503 desert ant navigation. *Nature* **394**, 269–272.
- 504 **Elvidge, C. K., Chuard, P. J. C. and Brown, G. E.** (2016). Local predation risk shapes  
505 spatial and foraging neophobia patterns in Trinidadian guppies. *Curr. Zool.* **62**, 457–  
506 462.
- 507 **Freas, C. A., Narendra, A. and Cheng, K.** (2017a). Compass cues used by a nocturnal bull  
508 ant, *Myrmecia midas*. *J. Exp. Biol.* jeb.152967.
- 509 **Freas, C. A., Narendra, A., Lemesle, C. and Cheng, K.** (2017b). Polarized light use in the  
510 nocturnal bull ant, *Myrmecia midas*. *R. Soc. Open Sci.* **4**.

- 511 **Freas, C. A. and Cheng, K.** (2018). Landmark learning, cue conflict, and outbound view  
512 sequence in navigating desert ants. *J. Exp. Psychol. Anim. Learn. Cogn.* **44**, 409–421.
- 513 **Freas, C. A., Wystrach, A., Narendra, A. and Cheng, K.** (2018). The view from the trees:  
514 Nocturnal bull ants, *Myrmecia midas*, use the surrounding panorama while descending  
515 from trees. *Front. Psychol.* **9**, 1–15.
- 516 **Freas, C. A. and Cheng, K.** (2019). Panorama similarity and navigational knowledge in the  
517 nocturnal bull ant *Myrmecia midas*. *J. Exp. Biol.* **222**.
- 518 **Graham, P. and Cheng, K.** (2009). Ants use the panoramic skyline as a visual cue during  
519 navigation. *Curr. Biol.* **19**, R935–R937.
- 520 **Greenberg, R.** (1998). The role of neophobia and neophilia in the development of innovative  
521 behaviour of birds. *Book Chapter 8*.
- 522 **Giurfa, M.** (2015). Learning and cognition in insects. *Wiley Interdiscip. Rev. Cogn. Sci.*  
523 **6**, 383–395.
- 524 **Islam, M., Freas, C. A. and Cheng, K.** (2020). Effect of large visual changes on the  
525 navigation of the nocturnal bull ant, *Myrmecia midas*. *Anim. Cogn.* **23**, 1071–1080
- 526 **Julle-Daniere, E., Schultheiss, P., Wystrach, A., Schwarz, S., Nooten, S. S., Bibost, A. L.  
527 and Cheng, K.** (2014). Visual matching in the orientation of desert ants (*Melophorus*  
528 *bagoti*): The effect of changing skyline height. *Ethology* **120**, 783–792.
- 529 **Juszcak, G. R. and Miller, M.** (2016). Detour behavior of mice trained with transparent,  
530 semitransparent and opaque barriers. *PLoS One* **11**, 1–23.
- 531 **Kabadayi, C., Bobrowicz, K. and Osvath, M.** (2018). The detour paradigm in animal  
532 cognition. *Anim. Cogn.* **21**, 21–35.
- 533 **Kevan, H. B. M. G. J. M. P. G.** (2015). Complex operant learning by worker bumblebees  
534 (*Bombus impatiens*): detour behaviour and use of colours as discriminative stimuli.  
535 *Insectes Soc.* **62**, 365–377.
- 536 **Kohler, W.** 1925 The mentality of apes Translated from the second revised edition by Ella  
537 Winter, BSc London: Kegan Paul, Trench. Trubner & Co, Ltd.
- 538 **Langbein, J.** (2018). Motor self-regulation in goats (*Capra aegagrus hircus*) in a detour-  
539 reaching task.
- 540 **Lihoreau, M. and Schwarz, S.** (2020). Insect Navigation. 1–8.
- 541 **Lockman, J. J. and Adams, C. D.** (2001). Going around transparent and grid-like barriers:  
542 Detour ability as a perception-action skill. *Dev. Sci.* **4**, 463–471.
- 543 **Lucon-Xiccato, T., Gatto, E. and Bisazza, A.** (2019). Male and female guppies differ in  
544 problem-solving abilities. *Curr. Zool.* 1–8.



- 545 **McCreery, H. F., Dix, Z. A., Breed, M. D. and Nagpal, R.** (2016). Collective strategy for  
546 obstacle navigation during cooperative transport by ants. *J. Exp. Biol.* **219**, 3366–3375.
- 547 **Mettke-hofmann, C., Winkler, H. and Leisler, B.** (2002). The Significance of Ecological  
548 Factors for Exploration and Neophobia in Parrots. **272**.
- 549 **Mettke-Hofmann, C., Lorentzen, S., Schlicht, E., Schneider, J. and Werner, F.** (2009).  
550 Spatial neophilia and spatial neophobia in resident and migratory warblers (Sylvia).  
551 *Ethology* **115**, 482–492.
- 552 **Moretti, L., Hentrup, M., Kotrschal, K. and Range, F.** (2015). The influence of  
553 relationships on neophobia and exploration in wolves and dogs. *Anim. Behav.* **107**, 159–  
554 173.
- 555 **Narendra, A. and Ramirez-esquivel, F.** (2017). Subtle changes in the landmark panorama  
556 disrupt visual navigation in a nocturnal bull ant. *Philos. Trans. R. Soc. B Biol. Sci.* **372**,  
557 20160068.
- 558 **Nawroth, C., Baciadonna, L. and Mcelligott, A. G.** (2016). Goats learn socially from  
559 humans in a spatial problem-solving task. *Anim. Behav.* **121**, 123–129.
- 560 **Ong, M., Bulmer, M., Groening, J. and Srinivasan, M. V.** (2017). Obstacle traversal and  
561 route choice in flying honeybees: Evidence for individual handedness. *PLoS One* **12**.
- 562 **Palavalli-Nettimi, R. and Narendra, A.** (2018). Miniaturisation decreases visual  
563 navigational competence in ants. *J. Exp. Biol.* **221**, jeb177238.
- 564 **Parker, K. J., Buckmaster, C. L., Justus, K. R., Schatzberg, A. F. and Lyons, D. M.**  
565 (2005). Mild early life stress enhances prefrontal-dependent response inhibition in  
566 monkeys. *Biol. Psychiatry* **57**, 848–855.
- 567 **Pongrácz, P., Miklósi, Á., Kubinyi, E., Gurobi, K., Topál, J. and Csányi, V.** (2001).  
568 Social learning in dogs: The effect of a human demonstrator on the performance of dogs  
569 in a detour task. *Anim. Behav.* **62**, 1109–1117.
- 570 **Pongrácz, P., Miklósi, Á., Vida, V. and Csányi, V.** (2005). The pet dogs ability for learning  
571 from a human demonstrator in a detour task is independent from the breed and age.  
572 *Appl. Anim. Behav. Sci.* **90**, 309–323.
- 573 **Tarsitano, M. S. and Jackson, R. R.** (1997). Araneophagic jumping spiders discriminate  
574 between detour routes that do and do not lead to prey. 257–266.
- 575 **Santer, R. D. and Hebets, E. A.** (2009). Tactile learning by a whip spider, *Phrynus*  
576 *marginemaculatus* C. L. Koch (Arachnida, Amblypygi). 393–399.
- 577 **Schmidt, I., Collett, T. S., Dillier, F. X. and Wehner, R.** (1992). How desert ants cope with  
578 enforced detours on their way home. *J. Comp. Physiol. A* **171**, 285–288.
- 579 **Seidl, T. and Wehner, R.** (2006). Visual and tactile learning of ground structures in desert  
580 ants. **4**, 3336–3344.

- 581 **Siniscalchi, M., Pergola, G. and Quaranta, A.** (2013). Detour behaviour in attack-trained  
582 dogs: Left-turners perform better than right-turners. *Laterality* **18**, 282–293.
- 583 **Smith, B. P. and Litchfield, C. A.** (2010). How well do dingoes, *Canis dingo*, perform on  
584 the detour task? *Anim. Behav.* **80**, 155–162.
- 585 **Sovrano, V. A., Baratti, G. and Potrich, D.** (2018). A detour task in four species of fishes.  
586 *Front. Psychol.* **9**, 1–7.
- 587 **Spigel, I. M.** (1964). Learning, retention, and disruption of detour behavior in the turtle. *J.*  
588 *Comp. Physiol. Psychol.* **57**, 108–112.
- 589 **Vallortigara, G., Regolin, L. and Pagni, P.** (1999). Detour behaviour, imprinting and visual  
590 lateralization in the domestic chick. 307–320.
- 591 **Wallis, J. D., Dias, R., Robbins, T. W. and Roberts, A. C.** (2001). Dissociable  
592 contributions of the orbitofrontal and lateral prefrontal cortex of the marmoset to  
593 performance on a detour reaching task. *Eur. J. Neurosci.* **13**, 1797–1808.
- 594 **Wolf H, Wehner R.** 2000 Pinpointing food sources: Olfactory and anemotactic orientation in  
595 desert ants, *Cataglyphis fortis*. *J. Exp. Biol.* **203**, 857–868
- 596 **Wynne, C. D. L. and Leguet, B.** (2004). Detour behavior in the Quokka (*Setonix*  
597 *brachyurus*). **67**, 281–286.
- 598 **Wystrach A, Beugnon G, Cheng K.** 2011 Landmarks or panoramas: what do navigating  
599 ants attend to for guidance? *Front. Zool.* **8**, 21
- 600 **Wystrach, A., Buehlmann, C., Schwarz, S., Cheng, K. and Graham, P.** (2020). Rapid  
601 Aversive and Memory Trace Learning during Route Navigation in Desert Ants. *Curr.*  
602 *Biol.* **30**, 1927-1933.e2.
- 603 **Zucca, P., Antonelli, F. and Vallortigara, G.** (2005). Detour behaviour in three species of  
604 birds: quails ( *Coturnix sp.* ), herring gulls ( *Larus cachinnans* ) and canaries ( *Serinus*  
605 *canaria* ). *Anim. Cogn.* **8**, 122–128.
